# Supplementary material for: Defluorination and covalent grafting of fluorinated graphene with TEMPO in a radical mechanism
Source: Royal Society of Chemistry journal article supplement (doi:10.1039/c7cp04439a), 2017-01-01
Supplement: c7cp04439a1.pdf [file c7cp04439a1.pdf]

## Supporting Information

of

### Defluorination and covalent grafting of fluorinated graphene with TEMPO in a radical mechanism

Wenchuan Lai, Dazhou Xu, Xu Wang\*, Zaoming Wang, Yang Liu, Xiaojiao Zhang,  
Yulong Li and Xiangyang Liu\*

State Key Laboratory of Polymer Materials Engineering, College of Polymer Science  
and Engineering, Sichuan University, Chengdu, Sichuan, 610065, P.R. China;

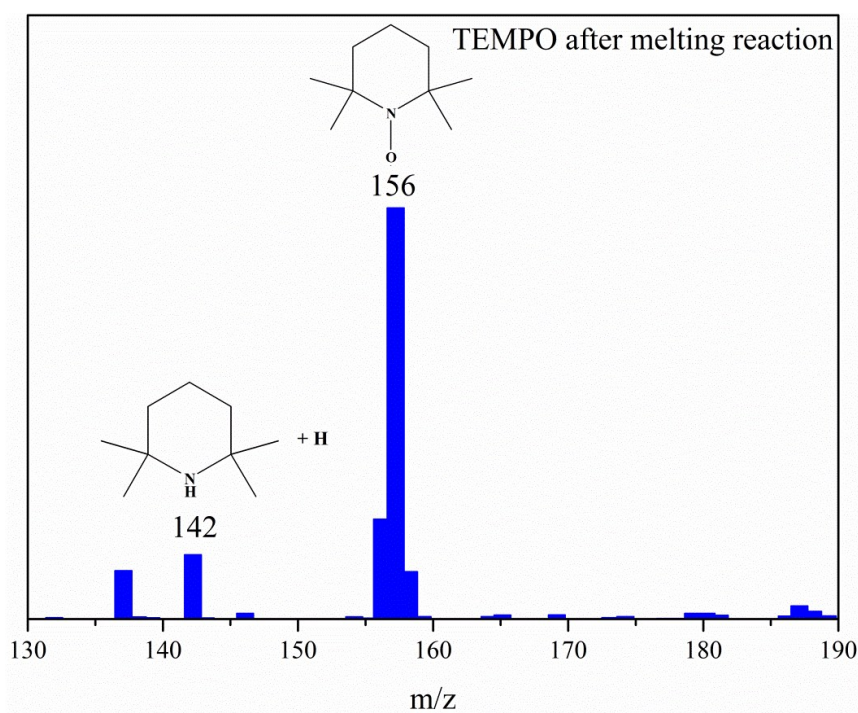

**Fig. S1.** ESI mass spectrum of liquid supernatant of FG/TEMPO after melting reaction.

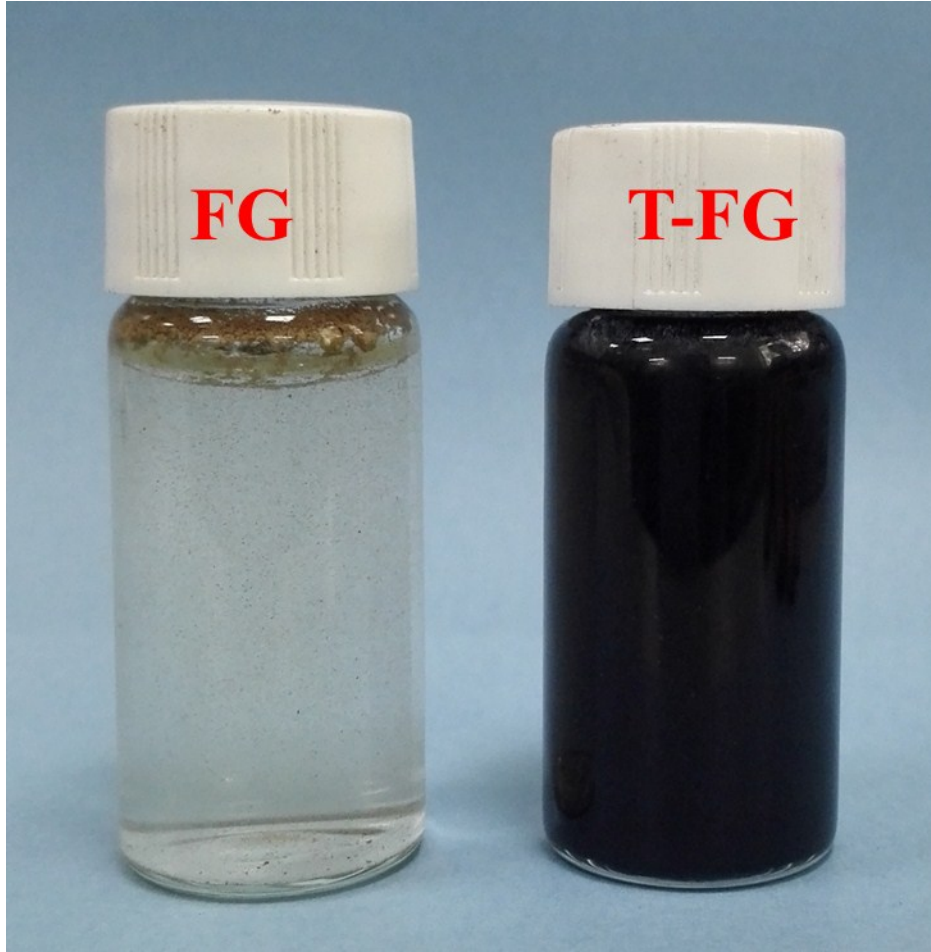

**Fig. S2** The comparison of FG and T-FG dispersed in water after 30min of ultrasonic treatment.

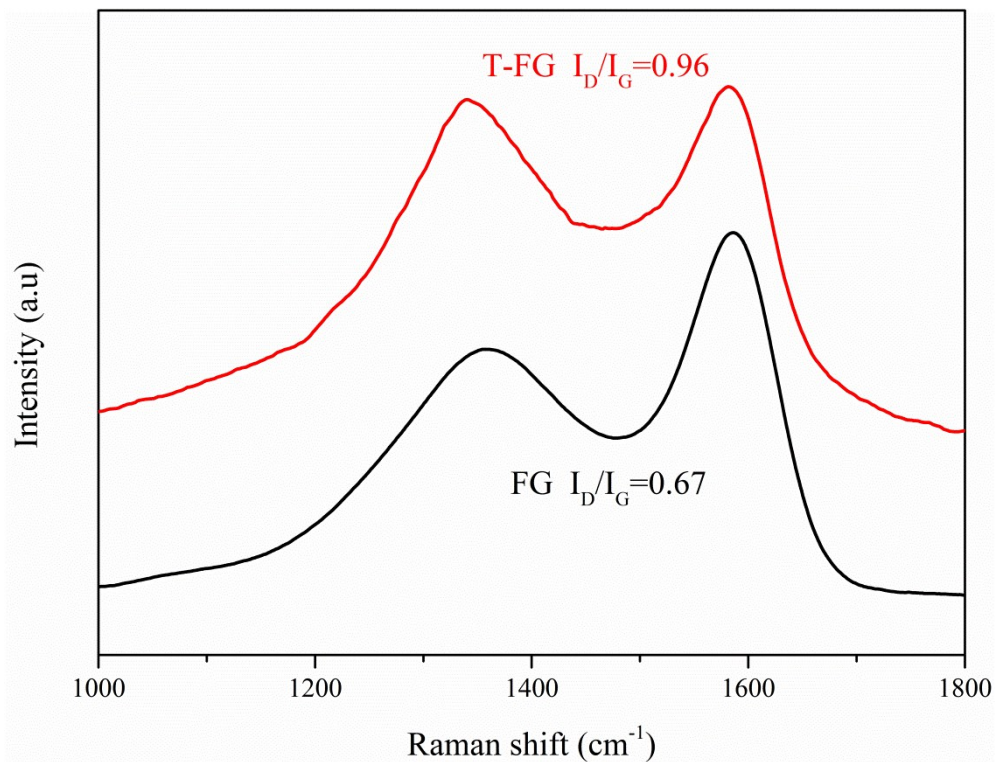

**Fig. S3** Raman spectra of FG and T-FG samples.

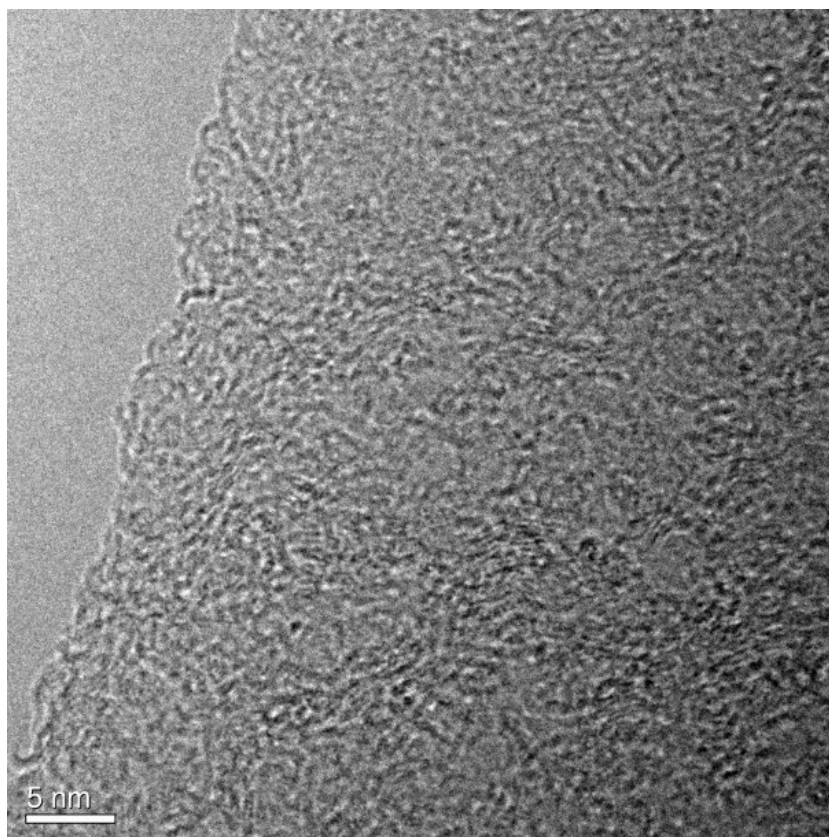

**Fig. S4** The microscopic image of the prepared T-FG obtained HR-TEM.
